# Supplementary material for: High precision and selectivity for quantitation of enrofloxacin and ciprofloxacin in five chicken tissues using solid phase extraction and ESI LC-MS/MS for application in monitoring residues
Source: Royal Society of Chemistry journal article supplement (doi:10.1039/c4ay02962c), 2015-01-01
Supplement: c4ay02962c1.pdf [file c4ay02962c1.pdf]

Electronic Supplementary Material (ESI) for Analytical Methods. This journal is © The Royal Society of Chemistry 2015. Number: 10.1039/c4ay02962c

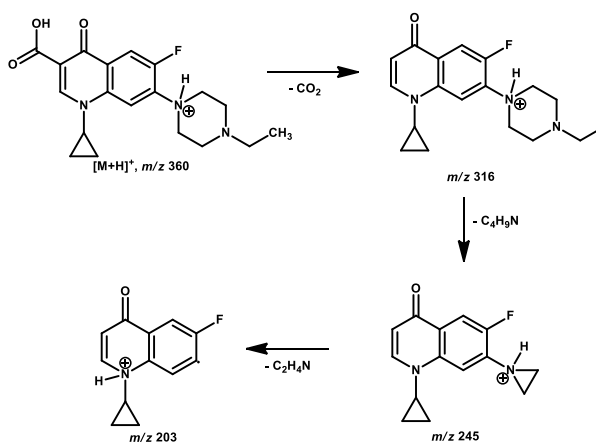

**Scheme 1S.** Proposed fragmentation mechanism of for protonated  $[M + H]^+$  of  $m/z$  360 (ENR). Note that to form the fragment ion of  $m/z$  203 loss of a neutral molecule of  $\text{C}_3\text{H}_6$  (42 Da) composition could also be proposed.

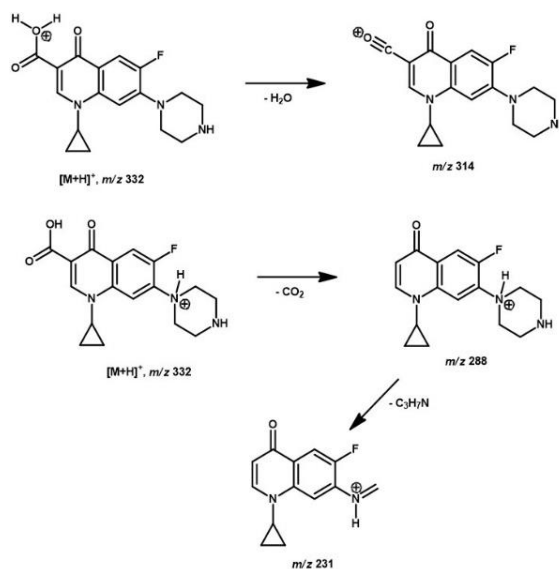

**Scheme 2S.** Proposed fragmentation mechanisms for protonated  $[M + H]^+$  of  $m/z$  332 (CIP).

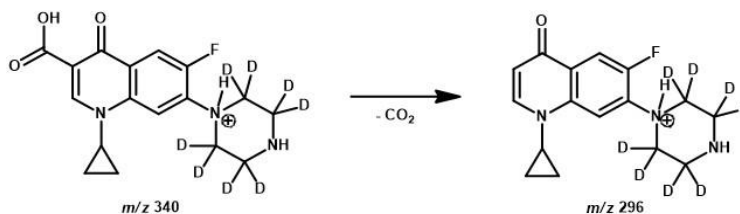

**Scheme 3S.** Proposed fragmentation mechanism for  $\text{CO}_2$  loss from protonated CIP-d8 of  $m/z$  340.

**Table 1S.** Method performance for ENR by LC-MS/MS.

| Plasma<br>ENR<br>(ng mL <sup>-1</sup> )  | Intra (n = 3)                      |        |              | Inter (n = 6)                      |        |              |
|------------------------------------------|------------------------------------|--------|--------------|------------------------------------|--------|--------------|
|                                          | mean + s<br>(ng mL <sup>-1</sup> ) | CV (%) | Recovery (%) | mean + s<br>(ng mL <sup>-1</sup> ) | CV (%) | Recovery (%) |
| 6.000                                    | 6.440 ± 0.530                      | 8.22   | 93.0         | 6.670 ± 0.730                      | 10.9   | 111          |
| 100.0                                    | 99.09 ± 6.08                       | 6.13   | 99.0         | 105.0 ± 5.76                       | 5.48   | 105          |
| 290.0                                    | 270.4 ± 8.18                       | 3.02   | 93.0         | 288.0 ± 8.76                       | 3.04   | 99.0         |
| 2600                                     | 2588 ± 76.3                        | 2.95   | 99.0         | 2590 ± 93.7                        | 3.62   | 99.0         |
| Liver<br>ENR<br>(ng g <sup>-1</sup> )    | Intra (n = 3)                      |        |              | Inter (n = 6)                      |        |              |
|                                          | mean + s<br>(ng g <sup>-1</sup> )  | CV (%) | Recovery (%) | mean + s<br>(ng g <sup>-1</sup> )  | CV (%) | Recovery (%) |
| 6.000                                    | 6.100 ± 0.701                      | 2.83   | 98.0         | 6.760 ± 0.792                      | 11.7   | 113          |
| 180.0                                    | 188.8 ± 2.65                       | 1.40   | 105          | 193.0 ± 5.81                       | 3.00   | 107          |
| 290.0                                    | 295.2 ± 4.65                       | 1.58   | 102          | 298.2 ± 6.75                       | 2.27   | 103          |
| 4000                                     | 4008.9 ± 11.0                      | 0.271  | 101          | 4033 ± 102.1                       | 2.53   | 101          |
| Kidney<br>ENR<br>(ng g <sup>-1</sup> )   | Intra (n = 3)                      |        |              | Inter (n = 6)                      |        |              |
|                                          | mean + s<br>(ng g <sup>-1</sup> )  | CV (%) | Recovery (%) | mean + s<br>(ng g <sup>-1</sup> )  | CV (%) | Recovery (%) |
| 6.000                                    | 6.300 ± 0.531                      | 8.59   | 105          | 6.880 ± 0.880                      | 12.8   | 114          |
| 120.0                                    | 124.5 ± 6.08                       | 4.88   | 103          | 127.8 ± 7.76                       | 6.07   | 107          |
| 290.0                                    | 295.3 ± 8.08                       | 2.73   | 102          | 298.3 ± 9.08                       | 3.04   | 103          |
| 6000                                     | 6021 ± 116                         | 1.93   | 100          | 6050 ± 223                         | 3.68   | 101          |
| Muscle<br>ENR<br>(ng g <sup>-1</sup> )   | Intra (n = 3)                      |        |              | Inter (n = 6)                      |        |              |
|                                          | mean + s<br>(ng g <sup>-1</sup> )  | CV (%) | Recovery (%) | mean + s<br>(ng g <sup>-1</sup> )  | CV (%) | Recovery (%) |
| 3.000                                    | 3.100 ± 0.151                      | 4.83   | 103          | 3.400 ± 0.230                      | 6.76   | 113          |
| 45.00                                    | 44.80 ± 2.65                       | 5.92   | 99.0         | 46.8 0± 3.80                       | 8.12   | 104          |
| 90.00                                    | 92.60 ± 3.63                       | 3.92   | 102          | 95.60 ± 5.63                       | 5.89   | 106          |
| 2600                                     | 2580 ± 50.14                       | 1.92   | 99.0         | 2677 ± 96.4                        | 3.60   | 103          |
| Skin/fat<br>ENR<br>(ng g <sup>-1</sup> ) | Intra (n = 3)                      |        |              | Inter (n = 6)                      |        |              |
|                                          | mean + s<br>(ng g <sup>-1</sup> )  | CV (%) | Recovery (%) | mean + s<br>(ng g <sup>-1</sup> )  | CV (%) | Recovery (%) |
| 6.000                                    | 5.880 ± 0.531                      | 9.01   | 98.0         | 6.070 ± 0.731                      | 12.0   | 102          |
| 100.0                                    | 97.50 ± 6.08                       | 6.23   | 98.0         | 103.0 ± 4.38                       | 4.25   | 103          |
| 290.0                                    | 288 .0 ± 8.18                      | 2.84   | 99.0         | 292.0 ± 3.66                       | 1.25   | 101          |
| 2600                                     | 2605 ± 76.3                        | 2.93   | 100          | 2630 ± 98.4                        | 3.74   | 101          |

**Table 2S.** Method performance for CIP by LC-MS/MS.

| Plasma<br>CIP<br>(ng mL <sup>-1</sup> )  | Intra (n = 3)                      |        |              | Inter (n = 6)                      |        |              |
|------------------------------------------|------------------------------------|--------|--------------|------------------------------------|--------|--------------|
|                                          | mean + s<br>(ng mL <sup>-1</sup> ) | CV (%) | Recovery (%) | mean + s<br>(ng mL <sup>-1</sup> ) | CV (%) | Recovery (%) |
| 6.000                                    | 6.300 ± 0.480                      | 7.62   | 105          | 6.800 ± 0.681                      | 10.0   | 113          |
| 100.0                                    | 105.6 ± 8.63                       | 8.17   | 106          | 107.0 ± 10.4                       | 9.71   | 107          |
| 290.0                                    | 298.6 ± 6.63                       | 2.22   | 103          | 297.0 ± 8.40                       | 2.82   | 102          |
| 2600                                     | 2659 ± 35.3                        | 1.33   | 102          | 2677 ± 63.7                        | 2.38   | 103          |
| Liver<br>CIP<br>(ng g <sup>-1</sup> )    | Intra (n = 3)                      |        |              | Inter (n = 6)                      |        |              |
|                                          | mean + s<br>(ng g <sup>-1</sup> )  | CV (%) | Recovery (%) | mean + s<br>(ng g <sup>-1</sup> )  | CV (%) | Recovery (%) |
| 6.000                                    | 6.300 ± 0.341                      | 5.40   | 105          | 6.450 ± 0.781                      | 12.1   | 108          |
| 180.0                                    | 182.5 ± 7.97                       | 4.36   | 101          | 185.0 ± 11.4                       | 6.16   | 103          |
| 290.0                                    | 298.3 ± 6.34                       | 2.12   | 103          | 300.3 ± 8.34                       | 1.28   | 103          |
| 4000                                     | 4058 ± 81.2                        | 2.00   | 101          | 4088 ± 109                         | 2.65   | 102          |
| Kidney<br>CIP<br>(ng g <sup>-1</sup> )   | Intra (n = 3)                      |        |              | Inter (n = 6)                      |        |              |
|                                          | mean + s<br>(ng g <sup>-1</sup> )  | CV (%) | Recovery (%) | mean + s<br>(ng g <sup>-1</sup> )  | CV (%) | Recovery (%) |
| 6.000                                    | 6.800 ± 0.481                      | 7.05   | 113          | 6.900 ± 0.661                      | 9.56   | 115          |
| 120.0                                    | 119.6 ± 10.6                       | 8.88   | 99.0         | 122.8 ± 11.4                       | 9.28   | 102          |
| 290.0                                    | 288.6 ± 8.63                       | 2.99   | 99.0         | 298.6 ± 10.6                       | 3.54   | 103          |
| 3000                                     | 3055 ± 25.3                        | 0.821  | 102          | 3078 ± 86.7                        | 2.81   | 103          |
| Muscle<br>CIP<br>(ng g <sup>-1</sup> )   | Intra (n = 3)                      |        |              | Inter (n = 6)                      |        |              |
|                                          | mean + s<br>(ng g <sup>-1</sup> )  | CV (%) | Recovery (%) | mean + s<br>(ng g <sup>-1</sup> )  | CV (%) | Recovery (%) |
| 3.000                                    | 3.100 ± 0.341                      | 11.0   | 103          | 3.200 ± 0.451                      | 14.0   | 106          |
| 45.00                                    | 43.50 ± 1.97                       | 4.52   | 97.0         | 48.40 ± 4.40                       | 9.09   | 107          |
| 90.00                                    | 94.60 ± 3.63                       | 3.83   | 105          | 96.60 ± 4.63                       | 4.80   | 107          |
| 2600                                     | 2595 ± 80.3                        | 3.10   | 99.0         | 2680 ± 100                         | 3.73   | 103          |
| Skin/fat<br>CIP<br>(ng g <sup>-1</sup> ) | Intra (n = 3)                      |        |              | Inter (n = 6)                      |        |              |
|                                          | mean + s<br>(ng g <sup>-1</sup> )  | CV (%) | Recovery (%) | mean + s<br>(ng g <sup>-1</sup> )  | CV (%) | Recovery (%) |
| 6.000                                    | 6.100 ± 0.452                      | 9.20   | 102          | 6.500 ± 0.860                      | 13.2   | 108          |
| 100.0                                    | 102.4 ± 7.62                       | 7.44   | 102          | 105.0 ± 10.4                       | 9.90   | 105          |
| 290.0                                    | 290.1 ± 7.43                       | 2.56   | 100          | 297.0 ± 9.33                       | 3.14   | 102          |
| 2600                                     | 2559 ± 38.3                        | 1.50   | 98.0         | 2677 ± 79.6                        | 2.97   | 103          |
